# Supplementary material
Source: MDPI journal article supplement (https://www.mdpi.com/2306-5729/8/4/70)
Supplement: s1 [file s1]

| Subject | Gender | Age (years) | Tooth | PPI (Pre-treatment) |
|---------|--------|-------------|-------|---------------------|
| 1       | Male   | 25          | 31    | 7.27                |
| 1       | Male   | 25          | 34    | 19.87               |
| 1       | Male   | 25          | 36    | 46.37               |
| 2       | Male   | 22          | 31    | 47.25               |
| 2       | Male   | 22          | 34    | 66.20               |
| 2       | Male   | 22          | 36    | 86.27               |
| 3       | Male   | 27          | 31    | 40.76               |
| 3       | Male   | 27          | 34    | 46.20               |
| 3       | Male   | 27          | 36    | 73.15               |
| 4       | Male   | 24          | 31    | 15.54               |
| 4       | Male   | 24          | 34    | 23.13               |
| 4       | Male   | 24          | 36    | 32.82               |
| 5       | Female | 41          | 31    | 59.92               |
| 5       | Female | 41          | 34    | 44.32               |
| 5       | Female | 41          | 36    | 80.15               |
| 6       | Female | 23          | 31    | 16.52               |
| 6       | Female | 23          | 34    | 10.66               |
| 6       | Female | 23          | 36    | 8.38                |
| 7       | Female | 22          | 31    | 13.22               |
| 7       | Female | 22          | 34    | 19.87               |
| 7       | Male   | 22          | 36    | 38.65               |
| 8       | Male   | 21          | 31    | 21.57               |
| 8       | Male   | 21          | 34    | 58.21               |
| 8       | Male   | 21          | 36    | 60.83               |
| 9       | Male   | 55          | 31    | 35.17               |
| 9       | Male   | 55          | 34    | 43.36               |
| 9       | Male   | 55          | 36    | 46.33               |
| 10      | Male   | 26          | 31    | 8.74                |
| 10      | Male   | 26          | 34    | 18.17               |
| 10      | Male   | 26          | 36    | 43.25               |
| 11      | Male   | 23          | 31    | 25.05               |
| 11      | Male   | 23          | 34    | 12.80               |
| 11      | Male   | 23          | 36    | 24.65               |
| 12      | Male   | 24          | 31    | 20.74               |
| 12      | Male   | 24          | 34    | 36.51               |
| 12      | Male   | 24          | 36    | 73.36               |
| 13      | Female | 25          | 31    | 28.44               |
| 13      | Female | 25          | 34    | 20.52               |
| 13      | Female | 25          | 36    | 47.61               |
| 14      | Female | 51          | 31    | 41.27               |
| 14      | Female | 51          | 34    | 34.81               |
| 14      | Female | 51          | 36    | 41.48               |
| 15      | Female | 25          | 31    | 24.32               |
| 15      | Female | 25          | 34    | 26.97               |
| 15      | Female | 25          | 36    | 51.11               |
| 16      | Female | 22          | 31    | 62.51               |
| 16      | Female | 22          | 34    | 51.60               |
| 16      | Female | 22          | 36    | 63.83               |
| 17      | Male   | 22          | 31    | 20.85               |

|    |        |    |    |       |
|----|--------|----|----|-------|
| 17 | Male   | 22 | 34 | 19.26 |
| 17 | Male   | 22 | 36 | 36.26 |
| 18 | Female | 22 | 31 | 15.01 |
| 18 | Female | 22 | 34 | 32.56 |
| 18 | Female | 22 | 36 | 69.73 |
| 19 | Male   | 27 | 31 | 5.84  |
| 19 | Male   | 27 | 34 | 13.30 |
| 19 | Male   | 27 | 36 | 36.91 |
| 20 | Male   | 21 | 31 | 29.18 |
| 20 | Male   | 21 | 34 | 18.65 |
| 20 | Male   | 21 | 36 | 79.23 |

**Average PPI (Pre-treatment)****PPI (Post- treatment)**

24.51

4.74

17.03

47.29

66.58

50.54

59.80

87.74

53.37

41.51

48.36

78.40

23.83

14.97

20.64

24.32

61.47

63.50

42.69

80.46

11.85

30.46

12.97

11.25

23.91

4.24

9.09

24.87

46.87

14.84

40.02

61.33

41.62

41.97

44.50

52.63

23.39

6.91

17.68

33.96

20.83

17.44

15.53

16.46

43.54

16.27

36.05

62.94

32.19

27.79

31.65

50.62

39.19

40.25

28.94

31.26

34.13

15.59

29.63

47.97

59.31

41.84

55.56

51.49

25.46

20.56

|       |       |
|-------|-------|
|       | 20.98 |
|       | 37.09 |
| 39.10 | 16.87 |
|       | 31.31 |
|       | 76.77 |
| 18.68 | 10.11 |
|       | 12.96 |
|       | 34.20 |
| 42.35 | 17.05 |
|       | 16.79 |
|       | 78.43 |

**Average PPI (Post-treatment)****PPI difference**

23.02

2.53

2.85

-0.92

66.03

-3.29

6.40

-1.46

56.09

-0.75

-2.16

-5.25

19.97

0.58

2.49

8.50

62.22

-3.57

1.62

-0.30

18.23

-13.94

-2.31

-2.87

12.73

8.99

10.78

13.77

38.73

6.73

18.19

-0.50

46.37

-6.80

-1.14

-6.30

19.52

1.84

0.49

9.29

16.48

7.61

-2.73

8.19

38.42

4.48

0.46

10.42

36.69

0.65

-11.13

-3.01

33.48

1.02

5.87

10.22

31.07

8.73

-2.66

3.14

49.63

20.67

-3.96

12.34

26.21

0.29

|       |       |
|-------|-------|
|       | -1.72 |
|       | -0.83 |
| 41.65 | -1.86 |
|       | 1.25  |
|       | -7.04 |
| 19.09 | -4.27 |
|       | 0.34  |
|       | 2.71  |
| 37.42 | 12.13 |
|       | 1.85  |
|       | 0.80  |

**Average PPI difference****TM-QHPI (Pre-treatment)**

1.49

3

3

4

0.55

3

5

4

-2.72

4

4

5

3.86

3

3

4

-0.75

4

4

5

-6.37

3

3

3

11.18

2

3

3

8.14

3

4

4

-4.74

3

3

4

3.87

3

3

4

4.36

3

3

3

5.12

3

3

4

-4.50

3

3

4

5.71

4

3

3

3.07

3

3

5

9.68

4

5

4

-0.75

3

|       |   |
|-------|---|
|       | 3 |
|       | 5 |
| -2.55 | 3 |
|       | 3 |
|       | 5 |
| -0.41 | 2 |
|       | 3 |
|       | 4 |
| 4.93  | 3 |
|       | 3 |
|       | 5 |



**Average TM-QHPI (Pre-treatment)****TM-QHPI (Post-treatment)**

3.33

2

3

4

4.00

3

4

4

4.33

4

3

5

3.33

3

3

4

4.33

4

4

5

3.00

3

3

3

2.67

1

3

3

3.67

2

4

4

3.33

3

3

4

3.33

3

3

4

3.00

3

3

3

3.33

3

3

4

3.33

3

3

4

3.33

4

3

3

3.67

3

3

5

4.33

4

5

4

3.67

3

|      |   |
|------|---|
|      | 3 |
|      | 5 |
| 3.67 | 3 |
|      | 3 |
|      | 5 |
| 3.00 | 2 |
|      | 3 |
|      | 4 |
| 3.67 | 2 |
|      | 2 |
|      | 5 |



|      |   |
|------|---|
|      | 0 |
|      | 0 |
| 3.67 | 0 |
|      | 0 |
|      | 0 |
| 3.00 | 0 |
|      | 0 |
|      | 0 |
| 3.00 | 1 |
|      | 1 |
|      | 0 |

**Average TM-QHPI difference**

0.33

0.33

0.33

0.00

0.00

0.00

0.33

0.33

0.00

0.00

0.00

0.00

0.00

0.00

0.00

0.00

0.00

0.00

0.00

0.67
