# Supplementary material
Source: MDPI journal article supplement (https://www.mdpi.com/2306-5729/8/4/70)

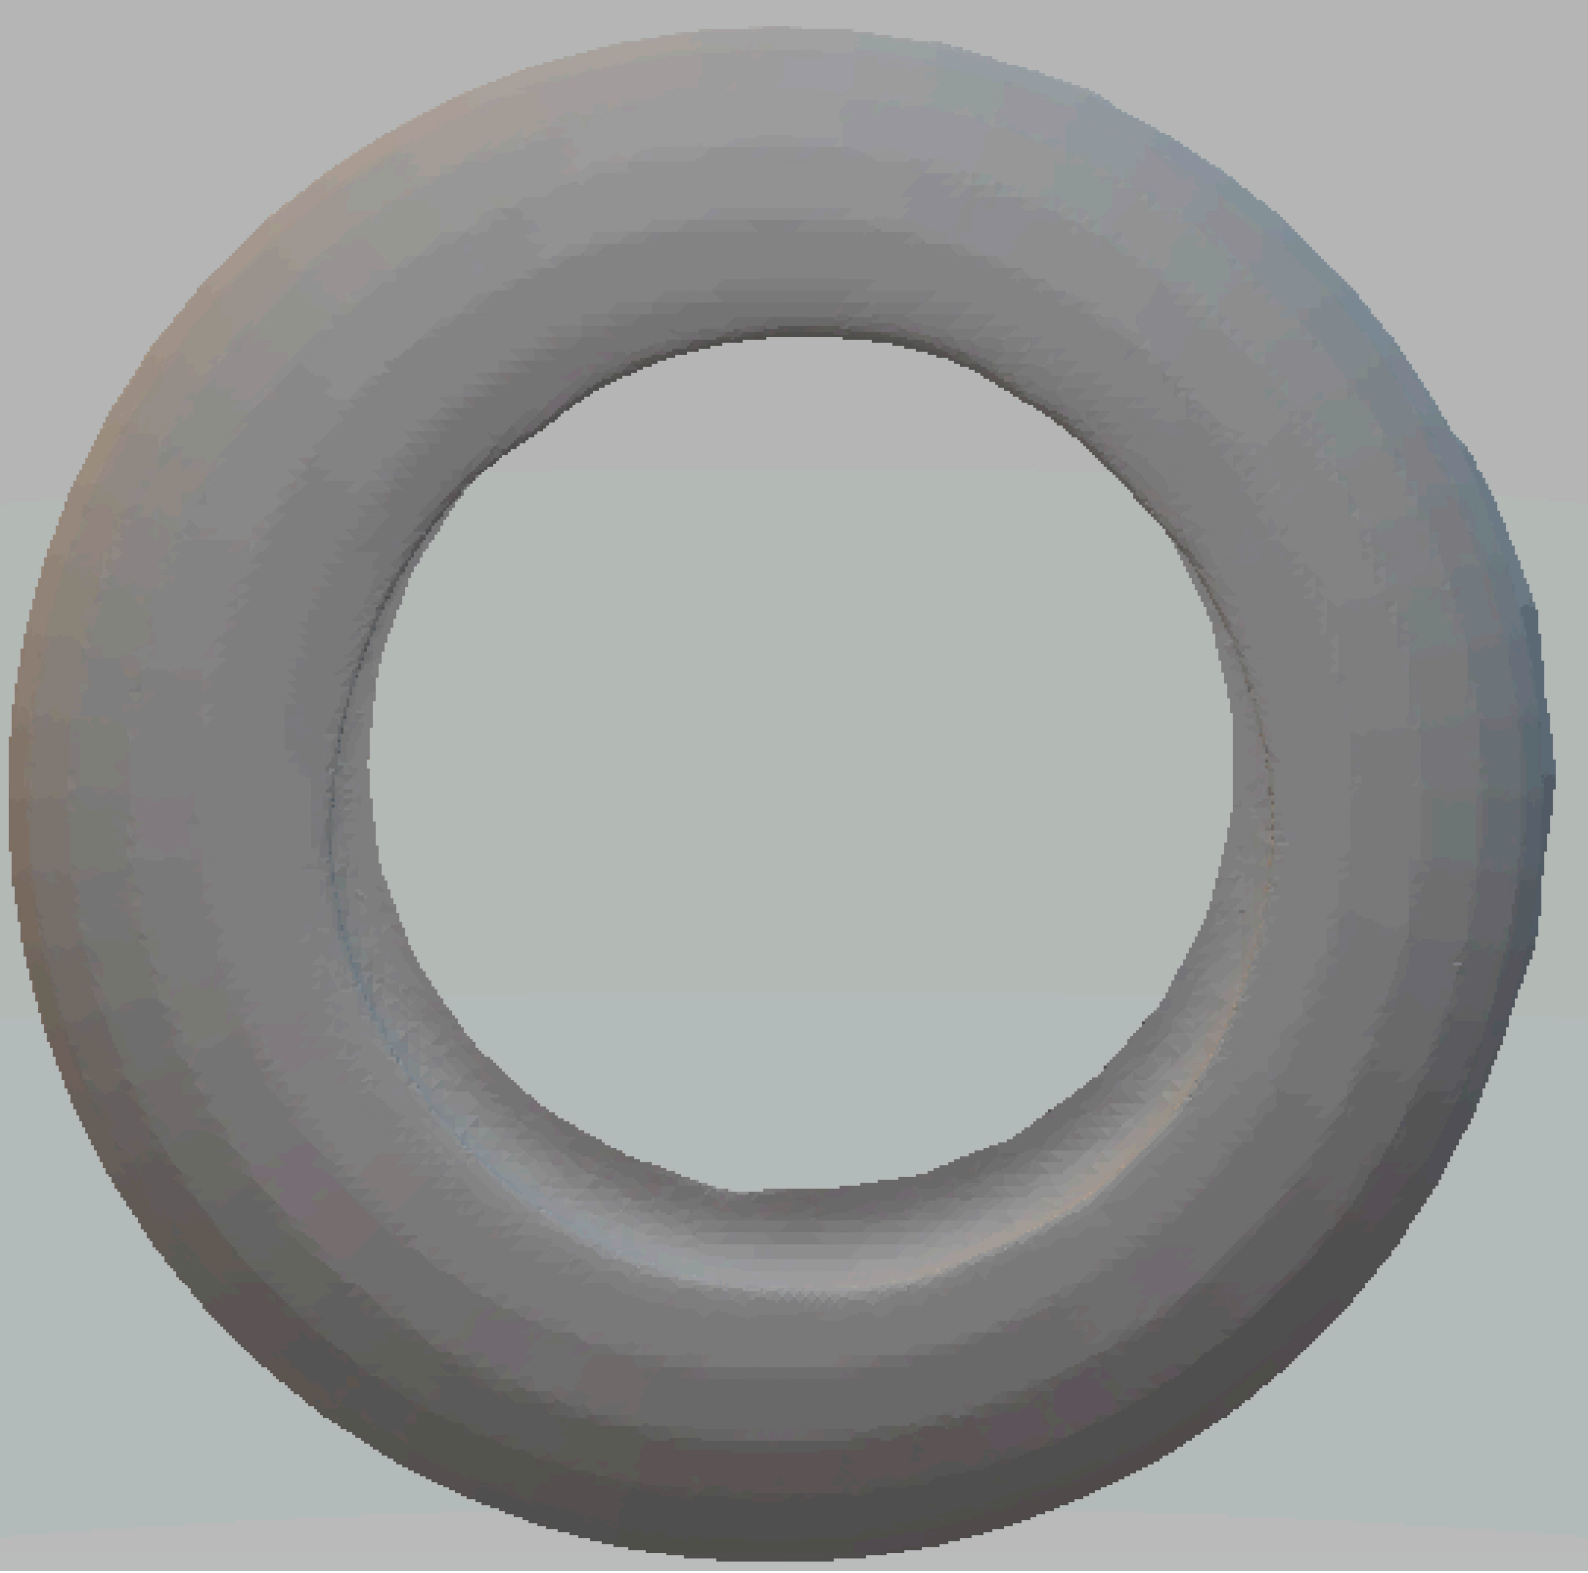

Supplement: s1 [file s1]
